# Supplementary material for: Unraveling the Diverse Profile of N-Acyl Homoserine Lactone Signals and Their Role in the Regulation of Biofilm Formation in Porphyra haitanensis-Associated Pseudoalteromonas galatheae
Source: MDPI journal article supplement (doi:10.3390/microorganisms11092228), 2023-09-04
Supplement: s1 [file s1]

# Unraveling the Diverse Profile of N-Acyl Homoserine Lactones Signals and their Role in the Regulation of Biofilm Formation in *Porphyra haitanensis* associated *Pseudoalteromonas galathea*

Muhammad Aslam <sup>1,2</sup>, Pengbing Pei <sup>1</sup>, Peilin Ye <sup>1</sup>, Tangcheng Li <sup>1</sup>, Honghao Liang <sup>1</sup>, Zezhi Zhang <sup>1</sup>, Xiao Ke <sup>1</sup>, Weizhou Chen <sup>1</sup> and Hong Du <sup>1,3,\*</sup>

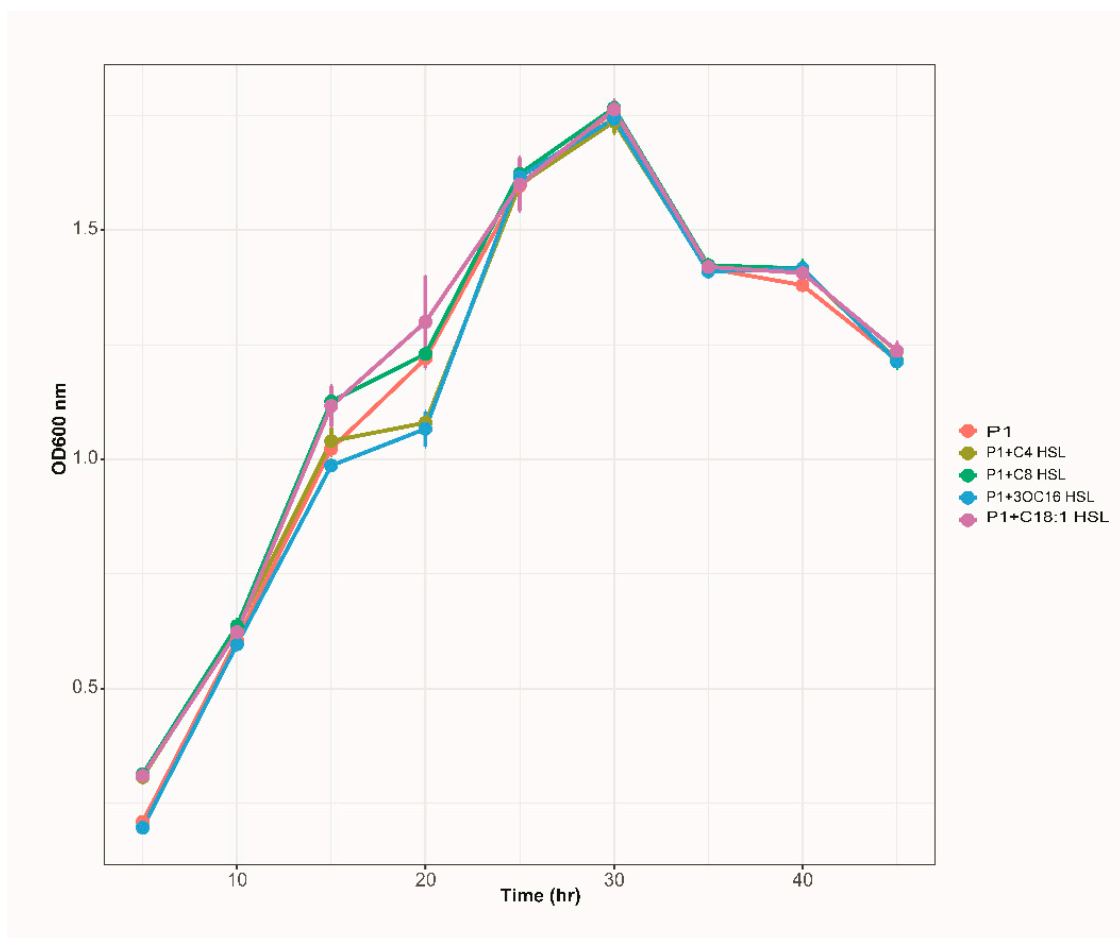

**Figure S1.** *P. galathea* growth in the presence of different HSLs shows no significant increase compared to growth in the absence of HSL.

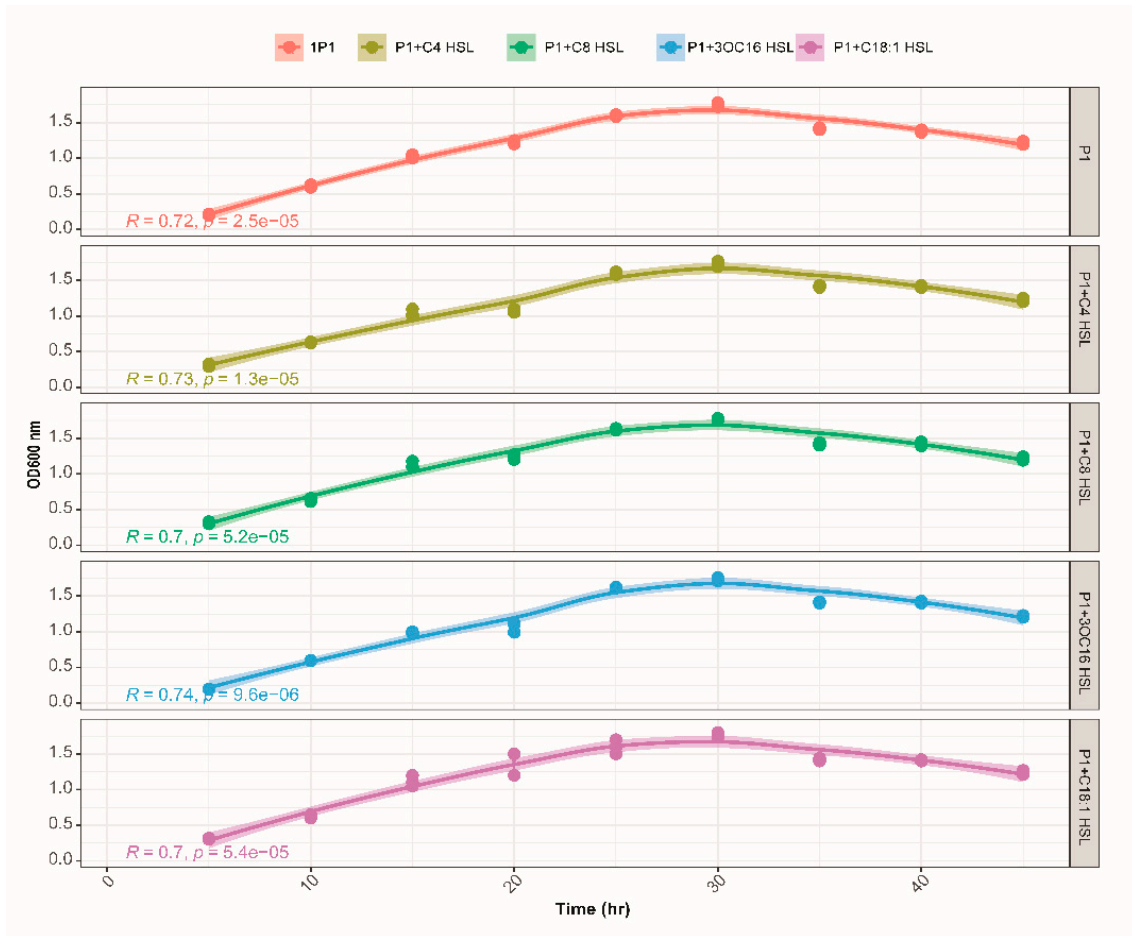

**Figure S2.** *P. galathea* demonstrate no correlation in the presence of different

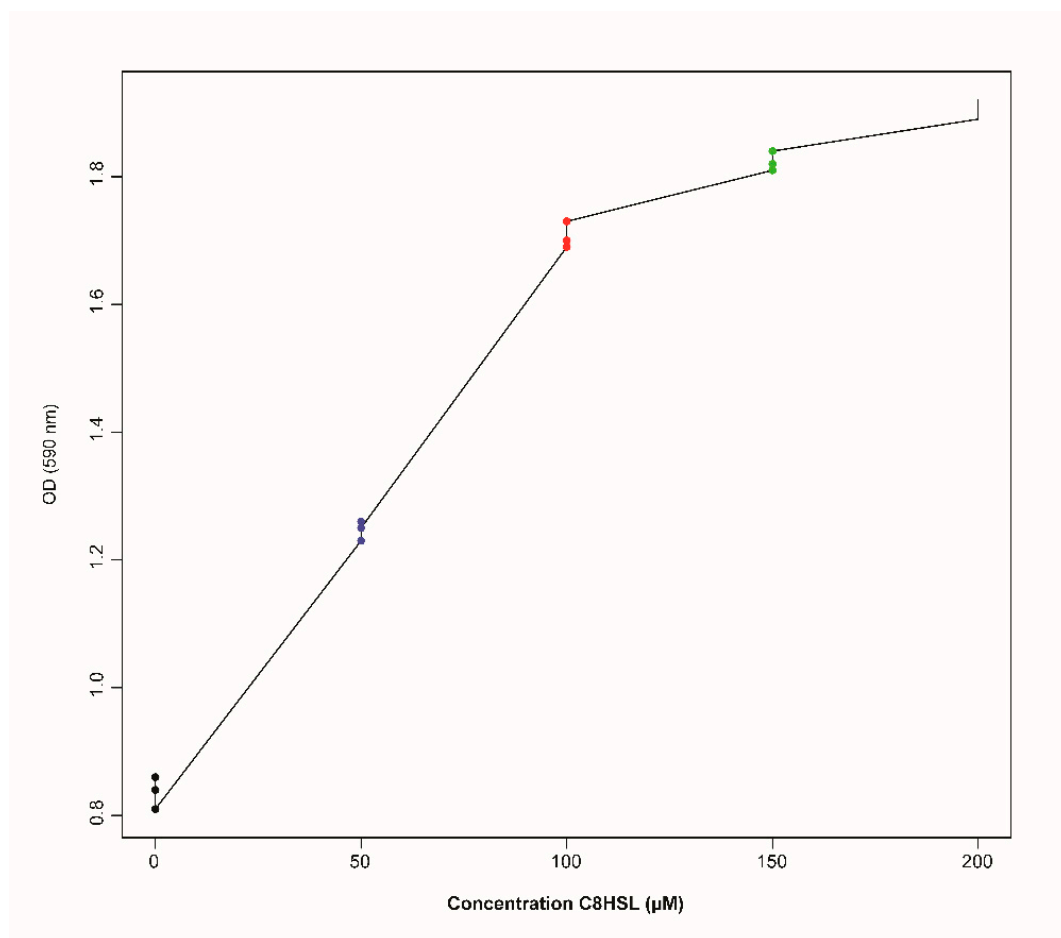

**Figure S3.** *P. galathea* exhibits a positive correlation between biofilm formation and increasing concentration of C8 HSL
